# Supplementary material for: Multiple imputation in Cox regression when there are time‐varying effects of covariates
Source: PubMed Central journal article supplement (PMC6220767; doi:10.1002/sim.7842), 2018-07-16

Multiple imputation in Cox regression when there are time-varying effects of exposures:

Supplementary materials

Ruth H. Keogh<sup>a</sup>, Tim P. Morris<sup>b</sup>

<sup>a</sup> Department of Medical Statistics, London School of Hygiene and Tropical Medicine,  
Keppel Street, London WC1E 7HT, UK.

<sup>b</sup> London Hub for Trials Methodology Research, MRC Clinical Trials Unit at UCL,  
Aviation House, 125 Kingsway, London WC2B 6NH, UK.

Multiple imputation in Cox regression when there are time-varying effects of exposures:

Supplementary materials

### S1. Derivation of imputation models in MI-TVE-Approx

The focus is on a single explanatory variable  $X_1$  with missing data and a fully observed covariate,  $X_2$ . The hazard model of interest is  $h(t|X_1, X_2) = h_0(t) \exp\{f_{X_1}(t; \beta_{X_1})X_1 + f_{X_2}(t; \beta_{X_2})X_2\}$ . In the context of Cox regression, MI relies on obtaining draws of missing values of  $X_1$  from its distribution given  $T, D, X_2$ . The probability density function for the conditional distribution of  $X_1$ , which we denote by  $p(X_1|T, D, X_2)$ , can be expressed as

$$p(X_1|T, D, X_2) = p(T, D|X_1, X_2)p(X_1|X_2)/p(T, D|X_2). \quad (\text{S1})$$

The first term can be written as

$$p(T, D|X_1, X_2) = h(T|X_1, X_2)^D S(T|X_1, X_2) h_C(T|X_1, X_2)^{1-D} S_C(T|X_1, X_2) \quad (\text{S2})$$

where  $S(\cdot)$  is the survivor function for the event of interest,  $h_C(t|X_1, X_2)$  is the hazard for censoring, and  $S_C(\cdot)$  is the survivor function corresponding to the censoring process. We assume for now that any censoring occurs independently of  $X_1$  and so the third and fourth terms of (S2) can be ignored in the workings which follow, since they do not involve  $X_1$ , and so can be subsumed into a constant of proportionality. Details on handling censoring which depends on  $X_1$  are given in the Discussion section of the paper. Under the hazard model of interest we have

$$\begin{aligned} \log p(T, D|X_1, X_2) &= D \log h_0(T) + D\{f_{X_1}(T, \beta_{X_1})X_1 + f_{X_2}(T, \beta_{X_2})X_2\} \\ &\quad - \int_0^T h_0(u) e^{f_{X_1}(u, \beta_{X_1})X_1 + f_{X_2}(u, \beta_{X_2})X_2} du. \end{aligned} \quad (\text{S3})$$

It follows that

$$\begin{aligned} \log p(X_1|T, D, X_2) &= \log p(X_1|X_2) + Df_{X_1}(T, \beta_{X_1})X_1 \\ &\quad - \int_0^T h_0(u)e^{f_{X_1}(u, \beta_{X_1})X_1 + f_{X_2}(u, \beta_{X_2})X_2} du + q(T, D, X_2) \end{aligned} \quad (\text{S4})$$

where  $q(T, D, X_2)$  represents terms not involving  $X_1$ .

In the situation with time varying effects the expression  $\log p(X_1|T, D, X_2)$  is complicated by the presence of  $e^{f_{X_1}(u, \beta_{X_1})X_1 + f_{X_2}(u, \beta_{X_2})X_2}$  in the integral. For some forms for the TVE functions a closed form solution to the integral would be possible, however a more general result is desirable. A linear approximation to  $e^{f_{X_1}(u, \beta_{X_1})X_1 + f_{X_2}(u, \beta_{X_2})X_2}$  is therefore used. The linear approximation is:

$$\begin{aligned} e^{f_{X_1}(u, \beta_{X_1})X_1 + f_{X_2}(u, \beta_{X_2})X_2} &\approx e^{f_{X_1}(\bar{u}, \beta_{X_1})X_1 + f_{X_2}(\bar{u}, \beta_{X_2})X_2} + (u - \bar{u})\{f'_{X_1}(\bar{u}, \beta_{X_1})X_1 \\ &\quad + f'_{X_2}(\bar{u}, \beta_{X_2})X_2\}e^{f_{X_1}(\bar{u}, \beta_{X_1})X_1 + f_{X_2}(\bar{u}, \beta_{X_2})X_2} \end{aligned} \quad (\text{S5})$$

where  $\bar{u}$  denotes the mean of the observed event times. The approximation is expected to perform well when the TVEs are not too large, i.e. when the log hazard ratios at any given time are not too large. Higher order approximations could be considered, and in Section S3 we consider a stepwise approximation. In the results given below, we let

$$A(X_1, X_2) = f_{X_1}(\bar{u}, \beta_{X_1})X_1 + f_{X_2}(\bar{u}, \beta_{X_2})X_2,$$

$$B(X_1, X_2) = f'_{X_1}(\bar{u}, \beta_{X_1})X_1 + f'_{X_2}(\bar{u}, \beta_{X_2})X_2.$$

To proceed, it is necessary to make some assumptions about  $p(X_1|X_2)$ . Next, we consider the situations of binary  $X_1$  and Normally distributed  $X_1$ .

### S1.1 Binary $X_1$

We assume a logistic model for  $X_1$  given  $X_2$ :

$$\text{logit } p(X_1 = 1|X_2) = \zeta_0 + \zeta_1 X_2. \quad (\text{S6})$$

First, suppose that  $X_2$  is also binary. Then, using the approximation in (S5), it can be shown that

$$\begin{aligned} \text{logit } p(X_1 = 1|T, D, X_2) &\approx \zeta_0 + \zeta_1 X_2 + D \times f_{X_1}(T; \beta_{X_1}) \\ &+ H_0(T)\{A(0, X_2) - A(1, X_2) + \bar{u}A(1, X_2)B(1, X_2) - \bar{u}A(0, X_2)B(0, X_2)\} \\ &+ H_1(T)\{A(0, X_2)B(0, X_2) - A(1, X_2)B(1, X_2)\} \end{aligned} \quad (\text{S7})$$

where  $H_0(T)$  denotes the cumulative baseline hazard and  $H_1(T) = \int_0^T u h_0(u) du$ .

If  $X_2$  is continuous, we use a bivariate linear approximation to  $e^{f_{X_1}(u, \beta_{X_1})X_1 + f_{X_2}(u, \beta_{X_2})X_2}$ , about  $\bar{u}$  and  $\bar{X}_2$  (the sample mean of  $X_2$ ). It can be shown that in this case

$$\begin{aligned} \text{logit } p(X_1 = 1|t, d, X_2) &\approx \zeta_0 + \zeta_1 X_2 + d \times f_{X_1}(t; \beta_{X_1}) \\ &+ H_0(t)\{-A(1, \bar{X}_2) - A(1, \bar{X}_2)f_{X_2}(\bar{u}; \beta_{X_2})(X_2 - \bar{X}_2) \\ &\quad + A(0, \bar{X}_2) + A(0, \bar{X}_2)f_{X_2}(\bar{u}; \beta_{X_2})(X_2 - \bar{X}_2) \\ &\quad + \bar{u}A(1, \bar{X}_2)B(1, \bar{X}_2) - \bar{u}A(0, \bar{X}_2)B(0, \bar{X}_2)\} \\ &+ H_1(t)\{A(0, \bar{X}_2)B(0, \bar{X}_2) - A(1, \bar{X}_2)B(1, \bar{X}_2)\} \end{aligned} \quad (\text{S8})$$

It follows from the expressions in (S7) and (S8) that an approximate imputation model for  $X_1$  is a logistic regression for  $X_1$  with main effects of  $X_2$ ,  $H_0(T)$ ,  $H_1(T)$ , the interaction between  $D$  and  $f_{X_1}(T)$ , and interactions of  $X_2$  with  $H_0(T)$  and  $H_1(T)$ . If the TVE function is  $f_{X_1}(t; \beta_{X_1}) = \beta_{X_01} + \beta_{X_11}t$ , for example, the imputation model should include  $D$  and the interaction between  $D$  and  $T$ . In the case of a restricted cubic spline with  $L = 5$  knots, the imputation model should include  $D$  and the interaction between  $D$  and  $T$  and interactions of  $D$  with

$$\left\{ (T - u_i)_+^3 - \left( \frac{(T - u_{L-1})_+^3 (u_L - u_i)}{(u_L - u_{L-1})} \right) + \left( \frac{(T - u_L)_+^3 (u_{L-1} - u_i)}{(u_L - u_{L-1})} \right) \right\} \text{ for } i = 1, 2, 3.$$

In the situation without TVEs, the above results reduce to those of White and Royston (2009). The imputation models involve the baseline cumulative hazard  $H_0(T)$  and the additional integral term  $H_1(T)$ . When there are no TVEs, the imputation model includes only  $H_0(T)$  and White and Royston (2009) White and Royston (2009)

suggested replacing this with the Nelson-Aalen estimate of the cumulative hazard,  $\widehat{H}(T) = \sum_{t \leq T} \frac{d(t)}{n(t)}$ , where  $d(t)$  is the number of events at time  $t$  and  $n(t)$  is the number of individuals at risk at time  $t$ . This has been found to perform at least as well as a more complex method using Breslow's estimate for  $H_0(T)$  in simulation studies. Following similar reasoning, we propose using the Nelson-Aalen-type estimator  $\widehat{H}^{(1)}(T) = \sum_{t \leq T} \frac{td(t)}{n(t)}$  in place of  $H_1(T)$ .

### S1.2 Continuous $X$

To derive an imputation model for a continuous  $X_1$  we assume that, conditionally on  $X_2$ ,  $X_1$  is normally distributed with mean  $\zeta_0 + \zeta_1 X_2$  and variance  $\sigma^2$ . The derivations, which are not shown in detail here, use a quadratic (i.e. second order) trivariate approximation for  $e^{f_{X_1}(u, \beta_{X_1})X_1 + f_{X_2}(u, \beta_{X_2})X_2}$  about  $\bar{u}$ ,  $\bar{X}_1$  and  $\bar{X}_2$ . It can be shown that an approximate imputation model for  $X_1$  is a linear regression of  $X_1$  with main effects of  $X_2$ ,  $H_0(T)$ ,  $H_1(T)$ , the interaction between  $D$  and  $f_{X_1}(T)$ , and interactions of  $X_2$  with  $H_0(T)$  and  $H_1(T)$ . That is, the imputation model contains the same terms as for binary  $X_1$  described above. AS above, we propose replacing  $H_0(T)$  and  $H_1(T)$  with the estimates  $\widehat{H}(T)$  and  $\widehat{H}^{(1)}$  respectively.

### S2. Extensions to MI-TVE-Approx and MI-TVE-SMC: handling missing data in more than one covariate using full conditional specification (FCS)

In this section we describe extensions to MI-TVE-Approx and MI-TVE-SMC for the situation with more than one covariate with missing data. Let  $X = (X_1, X_2, \dots, X_p)'$  denotes the vector of partially observed variables. The model of interest is assumed to be of the form

$$h(t|X) = h_0(t) \exp \left\{ \sum_k f_{X_k}(t; \beta_{X_k}) X_k \right\}$$

Additional fully observed covariates can be incorporated in a straightforward manner. For MI-TVE-approx, the FCS algorithm to generate a single imputed dataset is as follows.

1. Replace the missing values in  $X$  by arbitrary starting values, to create a complete data set. In practice, one could replace missing values of  $X_k$  ( $k = 1, \dots, p$ ) by the mean of  $X_k$  among those individuals in whom  $X_k$  is observed. Set  $k = 1$ .
2. If  $X_k$  is a continuous variable, fit the imputation model

$$X_k = \alpha_0 + \alpha'_1 X_{-k} + \alpha_2^T Df_{X_k}(T) + \alpha_3 \widehat{H}(T) + \alpha_4 \widehat{H}^{(1)}(T) + \alpha'_5 X_{-k} \widehat{H}(T) + \alpha'_6 X_{-k} \widehat{H}^{(1)}(T) + \epsilon,$$

with residual error variance  $\sigma_\epsilon^2$ , to the subset of individuals for whom  $X_k$  is observed, using the current values of  $X_{-k}$ . If  $X_k$  is a binary variable, the imputation model is the logistic regression

$$\begin{aligned} \text{logit Pr}(X_k = 1|T, D, X_{-k}) = & \alpha_0 + \alpha'_1 X_{-k} + \alpha_2^T Df_{X_k}(T) + \alpha_3 \widehat{H}(T) \\ & + \alpha_4 \widehat{H}^{(1)}(T) + \alpha'_5 X_{-k} \widehat{H}(T) + \alpha'_6 X_{-k} \widehat{H}^{(1)}(T). \end{aligned}$$

Take a random draw  $(\alpha_0^*, \alpha_1^*, \alpha_2^*, \alpha_3^*, \alpha_4^*, \alpha_5^*, \alpha_6^*, \sigma_\epsilon^{2*})$  (if  $X_k$  is continuous) or  $(\alpha_0^*, \alpha_1^*, \alpha_2^*, \alpha_3^*, \alpha_4^*, \alpha_5^*, \alpha_6^*)$  (if  $X_k$  is binary) from the approximate posterior distribution of the parameters in this model.

3. If  $X_k$  is continuous, then for each individual with missing  $X_k$  in the original data set, replace the current value of  $X_k$  with a sample from a normal distribution with mean
 
$$\alpha_0^* + \alpha_1^* X_{-k} + \alpha_2^{*T} Df_{X_1}(T) + \alpha_3^* \widehat{H}(T) + \alpha_4^* \widehat{H}^{(1)}(T) + \alpha_5^{*T} X_{-k} \widehat{H}(T) + \alpha_6^* X_{-k} \widehat{H}^{(1)}(T)$$
 and variance  $\sigma_\epsilon^{2*}$ . If  $X_k$  is binary, sample instead from a Bernoulli distribution with the same mean.
4. If  $k < p$ , set  $k = k + 1$  and return to step 2.

Repeat steps 2–4 until the sampled values of  $X$  converge in distribution. At this point, use these sampled values as the imputed values for the single imputed dataset. Repeat the whole process  $M$  times to generate  $M$  imputed datasets.

For MI-TVE-SMC with  $p$  partially observed variables, the algorithm to generate one imputed data set is as follows.

1. Replace the missing values in  $X$  with arbitrary starting values, to create a complete dataset. Set  $k = 1$ .
2. Fit the Cox regression model of interest, including the TVEs, to the current complete data set to obtain estimates  $\hat{\beta}_{X_k}$  ( $k = 1, \dots, p$ ) and their estimated variance  $\hat{\Sigma}$ . Draw values  $\beta_{X_k}^*$  ( $k = 1, \dots, p$ ) from a joint normal distribution with mean  $(\hat{\beta}_{X_1}, \dots, \hat{\beta}_{X_p})$  and variance  $\hat{\Sigma}$ .
3. Calculate Breslow's estimate, denoted  $H_0^*(t)$ , of the baseline cumulative hazard  $H_0(t)$  using the parameter values  $\beta_{X_k}^*$  ( $k = 1, \dots, p$ ) and the current imputations of  $X$ .
4. Fit a regression model (e.g. linear or logistic, as appropriate) of  $X_k$  on  $X_{-k}$  to the current complete data set. Draw a value  $\gamma_{X_k}^*$  from the approximate joint posterior distribution of the parameters  $\gamma_{X_k}$  in this model.
5. For each individual for whom  $X_k$  is missing, (a) draw a value  $X_k^*$  from the distribution  $p(X_k|X_{-k}; \gamma_{X_k}^*)$  and let  $X^*$  denote  $X$  with  $X_k$  replaced by its proposed value  $X_k^*$ , (b) draw a value  $U$  from a uniform distribution on  $[0, 1]$ , and (c) accept the proposal  $X_k^*$  if

$$\begin{cases} U \leq \exp \left[ - \sum_{j:t_j \leq T} \Delta H_0^{(m)}(t_j) \exp \left\{ \sum_k f_{X_k} \left( t_j; \beta_{X_k}^{(m)} \right) X_k^* \right\} \right] & \text{if } D = 0 \\ U \leq \Delta H_0^{(m)}(T) \exp \left\{ 1 + f_{X_k} \left( T; \beta_{X_k}^{(m)} \right) X_k^* - \sum_{j:t_j \leq T} \Delta H_0^{(m)}(t_j) e^{f_{X_k} \left( t_j; \beta_{X_k}^{(m)} \right) X_k^*} \right\} & \text{if } D = 1 \end{cases}$$

If  $X_k^*$  is not accepted, then discard it and repeat (a), (b) and (c).

6. If  $k < p$ , let  $k = k + 1$  and return to step 2.

Repeat steps 2–6 until the sampled values of  $X$  converge in distribution. At this point, use these sampled values as the imputed values for the single imputed dataset. Repeat the whole process  $M$  times to generate  $M$  imputed datasets.

### S3. Using a step-function form for the time-varying effect

A simple approach to investigating the TVE of a covariate is to assume a step function form for  $f_X(t; \beta)$ , such that the hazard ratio is assumed constant within a series of time periods (see for example Gore, Pocock, and Kerr (1984)). In the case, focusing on our situation with a partially observed covariate  $X_1$  and a fully observed covariate  $X_2$ , the hazard function is

$$h(t|X_1, X_2) = h_0(t) \exp \left\{ \sum_{j=1}^K \beta_{X1j} I_j X_1 + \sum_{j=1}^K \beta_{X2j} I_j X_2 \right\} \quad (\text{S9})$$

where there are  $K$  time periods  $(0, s_1], (s_1, s_2], \dots, (s_{K-1}, s_K]$  and  $I_k = I(s_{k-1} < t \leq s_k)$  is an indicator taking value 1 if  $t$  lies in the interval from  $s_{k-1}$  to  $s_k$  ( $k = 1, \dots, K$ ) and 0 otherwise. A step function is unlikely to represent the true underlying time-varying effect and more realistic models are based on splines or other flexible functional forms, which are the main focus of the paper. However, because a step-function is sometimes used, we present some brief details here. By following similar workings as shown in Section S1, it can be shown that a suitable imputation model for  $X_1$  is a logistic regression (for binary  $X_1$ ) or linear regression (for continuous  $X_1$ ) on  $X_2$ ,  $DI_k$  ( $k = 1, \dots, K$ ),  $H_k^*$  ( $k = 1, \dots, K_T$ ),  $H_T^*$ ,  $X_2 H_k^*$  ( $k = 1, \dots, K_T$ ) and  $X_2 H_T^*$ , where  $H_k^* = \int_{s_{k-1}}^{s_k} h_0(u) du$ ,  $H_T^* = \int_{s_T}^T h_0(u) du$ ,  $K_T$  is the number of complete time periods which have passed prior to  $T$ , and  $s_T$  is the upper limit of the last complete time period prior to  $T$ . We propose replacing  $H_k^*$  and  $H_T^*$  by their estimates  $\widehat{H}_k^* = \sum_{s_{k-1} < t \leq s_k} \frac{d(t)}{n(t)}$  and  $\widehat{H}_T^* = \sum_{s_T < t \leq T} \frac{d(t)}{n(t)}$ . A feature of the imputation model for TVEs based on a step function is that we do not require a linear (or other) approximation to evaluate the integral in S4.

### S4. Simulation study: Details on missing data generation

In the main simulation, non-monotone missing data were generated in  $X_1$  and  $X_2$  according to a MAR mechanism in which the probability of missingness in  $X_1$  depends on observed values of  $X_2$ , and vice versa. To achieve this, the cohort was divided



randomly into three groups of approximately equal size. In group 1,  $X_2$  is fully observed and  $X_1$  was set to be missing with probability  $e^{0.4+0.5X_2}/(1 + e^{0.4+0.5X_2})$ . In group 2,  $X_1$  is fully observed and  $X_2$  was set to be missing with probability  $e^{0.4+0.5X_1}/(1 + e^{0.4+0.5X_1})$ . In group 3,  $X_1$  and  $X_2$  were *both* missing completely at random with probability 0.3.

In additional simulations (Section 5.5), the probability of missingness in  $X_1$  and  $X_2$  additionally depends on the event indicator  $D$ . The procedure described above was modified such that in group 1 the probability of missingness in  $X_1$  was  $e^{-0.4+0.5X_2+0.5D+0.5X_2D}/(1 + e^{-0.4+0.5X_2+0.5D+0.5X_2D})$ , in group 2 probability of missingness in  $X_2$  was  $e^{-0.4+0.5X_1+0.5D+0.5X_1D}/(1 + e^{-0.4+0.5X_1+0.5D+0.5X_1D})$ , and in group 3  $X_1$  and  $X_2$  were *both* missing with probability  $e^{-0.4+0.5D}/(1 + e^{-0.4+0.5D})$ .

The values used in these missing data generation procedures were selected so that  $X_1$  is missing for approximately 30% of individuals and  $X_2$  is missing for approximately 30% of individuals, resulting in approximately 50% of individuals missing at least one of the measurements.

In an additional simulation (Section 5.5) a lower proportion with missing data was considered. For this, in group 1,  $X_2$  is fully observed and  $X_1$  was set to be missing with probability  $e^{-1.2+0.5X_2}/(1 + e^{-1.2+0.5X_2})$ . In group 2,  $X_1$  is fully observed and  $X_2$  was set to be missing with probability  $e^{-1.2+0.5X_1}/(1 + e^{-1.2+0.5X_1})$ . In group 3,  $X_1$  and  $X_2$  were *both* missing completely at random with probability 0.1.

### S5. Simulation study: Justification of number of simulated data sets

The performance measures described in Section 5.3 were used to determine the number of repetitions under each scenario. We are primarily interested in bias, and assume that the variance of bias at any given  $t$  is 0.1. Then the Monte Carlo standard error for the bias is

$$\text{MCSE} = \sqrt{\frac{\text{Var}}{\text{reps}}}. \quad (\text{S10})$$

Aiming for MCSE of 0.015 on estimated bias, we require 445 repetitions, and rounded up to 500.

Secondary interest is in rejection fractions and coverage, for which the summary of

a simulation run is binary. Here, for rejection fraction  $\pi$  the MCSE is

$$\text{MCSE} = \sqrt{\frac{\pi(1-\pi)}{\text{reps}}}. \quad (\text{S11})$$

The MCSE is maximised at  $\pi = 0.5$ , for which 500 repetitions returns MCSE of 2.2% , which we find acceptable. If tests have approximately the correct size, then at  $\pi = 0.05$ ,  $\text{MCSE} = 1\%$

## References

- Gore, S., Pocock, S., & Kerr, G. (1984). Regression models and non-proportional hazards in the analysis of breast cancer survival. *Journal of the Royal Statistical Society (Series C)*, *33*, 176–195.
- White, I. R., & Royston, P. (2009). Imputing missing covariate values for the Cox model. *Statistics in Medicine*, *28*, 1982-1998.

Table S1

Coverage of the estimated TVE curve at three time points (1, 5, 9) for covariates  $X_1$  and  $X_2$  in the setting with binary covariates  $X_1$  and  $X_2$ .

|                   | Covariate $X_1$ |     |     | Covariate $X_2$ |     |     |
|-------------------|-----------------|-----|-----|-----------------|-----|-----|
|                   | 1               | 5   | 9   | 1               | 5   | 9   |
| <b>Scenario 1</b> |                 |     |     |                 |     |     |
| Complete-data     | 96              | 100 | 100 | 95              | 100 | 100 |
| Complete-case     | 98              | 100 | 100 | 95              | 100 | 100 |
| MI-Approx         | 99              | 100 | 100 | 98              | 100 | 100 |
| MI-SMC            | 99              | 100 | 100 | 98              | 100 | 100 |
| MI-TVE-Approx     | 96              | 100 | 100 | 96              | 100 | 100 |
| MI-TVE-SMC        | 96              | 100 | 100 | 95              | 100 | 100 |
| <b>Scenario 2</b> |                 |     |     |                 |     |     |
| Complete-data     | 95              | 100 | 100 | 96              | 100 | 100 |
| Complete-case     | 98              | 100 | 100 | 95              | 100 | 100 |
| MI-Approx         | 95              | 100 | 100 | 98              | 100 | 100 |
| MI-SMC            | 93              | 100 | 100 | 98              | 100 | 100 |
| MI-TVE-Approx     | 96              | 100 | 100 | 95              | 100 | 100 |
| MI-TVE-SMC        | 94              | 100 | 100 | 94              | 100 | 100 |
| <b>Scenario 3</b> |                 |     |     |                 |     |     |
| Complete-data     | 94              | 100 | 100 | 95              | 100 | 100 |
| Complete-case     | 95              | 100 | 100 | 96              | 100 | 100 |
| MI-Approx         | 98              | 100 | 100 | 98              | 100 | 100 |
| MI-SMC            | 98              | 100 | 100 | 98              | 100 | 100 |
| MI-TVE-Approx     | 95              | 100 | 100 | 96              | 100 | 100 |
| MI-TVE-SMC        | 95              | 100 | 100 | 95              | 100 | 100 |
| <b>Scenario 4</b> |                 |     |     |                 |     |     |
| Complete-data     | 96              | 100 | 100 | 97              | 100 | 100 |
| Complete-case     | 96              | 100 | 100 | 96              | 100 | 100 |
| MI-Approx         | 99              | 100 | 100 | 99              | 100 | 100 |
| MI-SMC            | 99              | 100 | 100 | 99              | 100 | 100 |
| MI-TVE-Approx     | 98              | 100 | 100 | 98              | 100 | 100 |
| MI-TVE-SMC        | 97              | 100 | 100 | 97              | 100 | 100 |
| <b>Scenario 5</b> |                 |     |     |                 |     |     |
| Complete-data     | 95              | 100 | 100 | 95              | 100 | 100 |
| Complete-case     | 96              | 100 | 100 | 95              | 100 | 100 |
| MI-Approx         | 99              | 100 | 100 | 98              | 100 | 100 |
| MI-SMC            | 99              | 100 | 100 | 98              | 100 | 100 |
| MI-TVE-Approx     | 95              | 100 | 100 | 95              | 100 | 100 |
| MI-TVE-SMC        | 95              | 100 | 100 | 96              | 100 | 100 |

Table S2

Coverage of the estimated TVE curve at three time points (1, 5, 9) for covariates  $X_1$  and  $X_2$  in the setting with continuous covariates  $X_1$  and  $X_2$ .

|                   | Covariate $X_1$ |     |     | Covariate $X_2$ |     |     |
|-------------------|-----------------|-----|-----|-----------------|-----|-----|
|                   | 1               | 5   | 9   | 1               | 5   | 9   |
| <b>Scenario 1</b> |                 |     |     |                 |     |     |
| Complete-data     | 96              | 100 | 100 | 96              | 100 | 100 |
| Complete-case     | 95              | 100 | 100 | 97              | 100 | 100 |
| MI-Approx         | 99              | 100 | 100 | 99              | 100 | 100 |
| MI-SMC            | 99              | 100 | 100 | 99              | 100 | 100 |
| MI-TVE-Approx     | 96              | 100 | 100 | 96              | 100 | 100 |
| MI-TVE-SMC        | 97              | 100 | 100 | 96              | 100 | 100 |
| <b>Scenario 2</b> |                 |     |     |                 |     |     |
| Complete-data     | 94              | 100 | 100 | 94              | 100 | 100 |
| Complete-case     | 96              | 100 | 100 | 96              | 100 | 100 |
| MI-Approx         | 92              | 100 | 100 | 97              | 100 | 100 |
| MI-SMC            | 86              | 100 | 100 | 97              | 100 | 100 |
| MI-TVE-Approx     | 95              | 100 | 100 | 95              | 100 | 100 |
| MI-TVE-SMC        | 95              | 100 | 100 | 95              | 100 | 100 |
| <b>Scenario 3</b> |                 |     |     |                 |     |     |
| Complete-data     | 94              | 100 | 100 | 96              | 100 | 100 |
| Complete-case     | 95              | 100 | 100 | 95              | 100 | 100 |
| MI-Approx         | 99              | 100 | 100 | 98              | 100 | 100 |
| MI-SMC            | 98              | 100 | 100 | 99              | 100 | 100 |
| MI-TVE-Approx     | 93              | 100 | 100 | 96              | 100 | 100 |
| MI-TVE-SMC        | 95              | 100 | 100 | 96              | 100 | 100 |
| <b>Scenario 4</b> |                 |     |     |                 |     |     |
| Complete-data     | 100             | 100 | 100 | 100             | 100 | 100 |
| Complete-case     | 100             | 100 | 100 | 100             | 100 | 100 |
| MI-Approx         | 100             | 100 | 100 | 100             | 100 | 100 |
| MI-SMC            | 100             | 100 | 100 | 100             | 100 | 100 |
| MI-TVE-Approx     | 100             | 100 | 100 | 100             | 100 | 100 |
| MI-TVE-SMC        | 100             | 100 | 100 | 100             | 100 | 100 |
| <b>Scenario 5</b> |                 |     |     |                 |     |     |
| Complete-data     | 98              | 100 | 100 | 99              | 100 | 100 |
| Complete-case     | 99              | 100 | 100 | 98              | 100 | 100 |
| MI-Approx         | 100             | 100 | 100 | 100             | 100 | 100 |
| MI-SMC            | 100             | 100 | 100 | 100             | 100 | 100 |
| MI-TVE-Approx     | 99              | 100 | 100 | 99              | 100 | 100 |
| MI-TVE-SMC        | 97              | 100 | 100 | 98              | 100 | 100 |

Figure S1. Bias in the estimated TVE curve at three time points for covariate  $X_1$  in the setting with binary covariates  $X_1$  (black) and  $X_2$  (grey). The point indicates the bias and the bar indicates the 95% confidence interval.

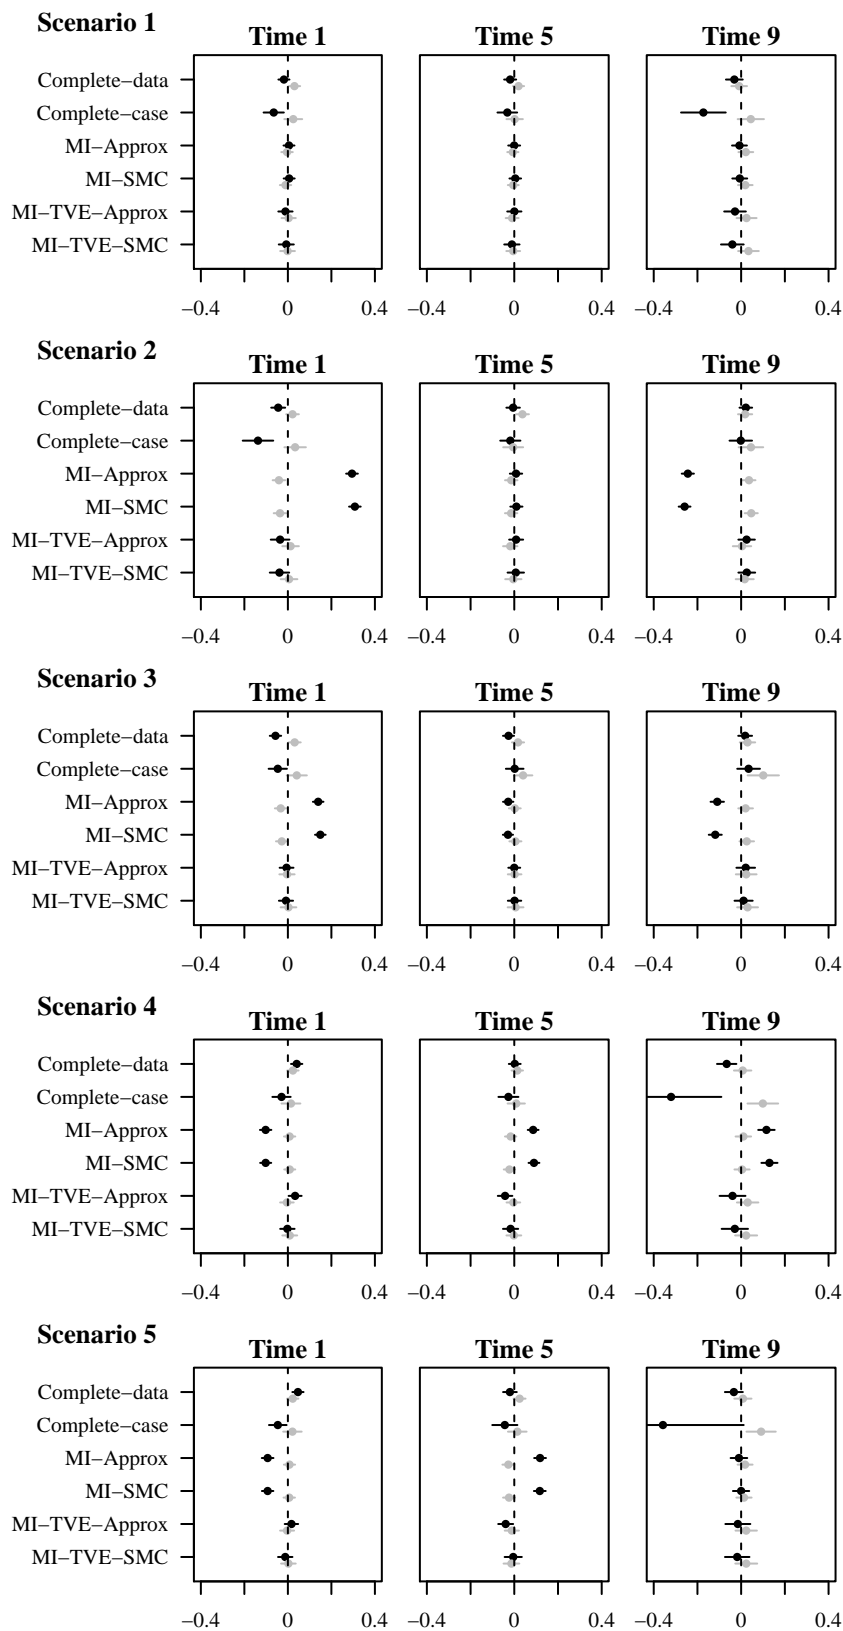

Figure S2. Bias in the estimated TVE curve at three time points for covariate  $X_1$  in the setting with continuous covariates  $X_1$  (black) and  $X_2$  (grey). The point indicates the bias and the bar indicates the 95% confidence interval.

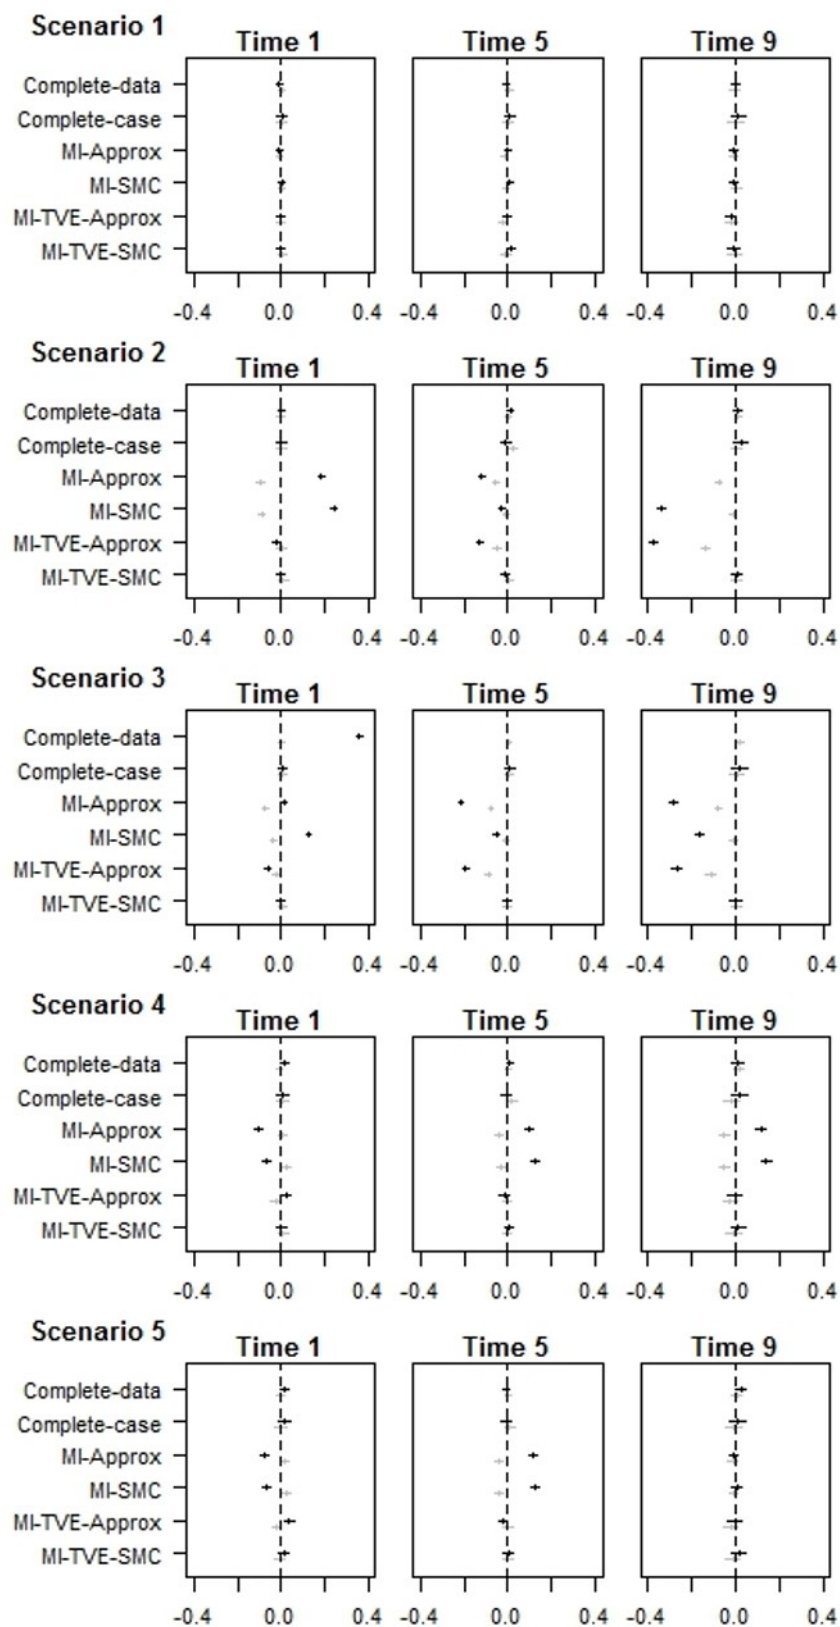

Figure S3. Curve-wise estimates of TVEs for covariate  $X_2$  in the setting with binary covariates  $X_1$  and  $X_2$ . The dotted black line indicates the true curve. The curves are all approximately flat because  $X_2$  always has a non-TVE.

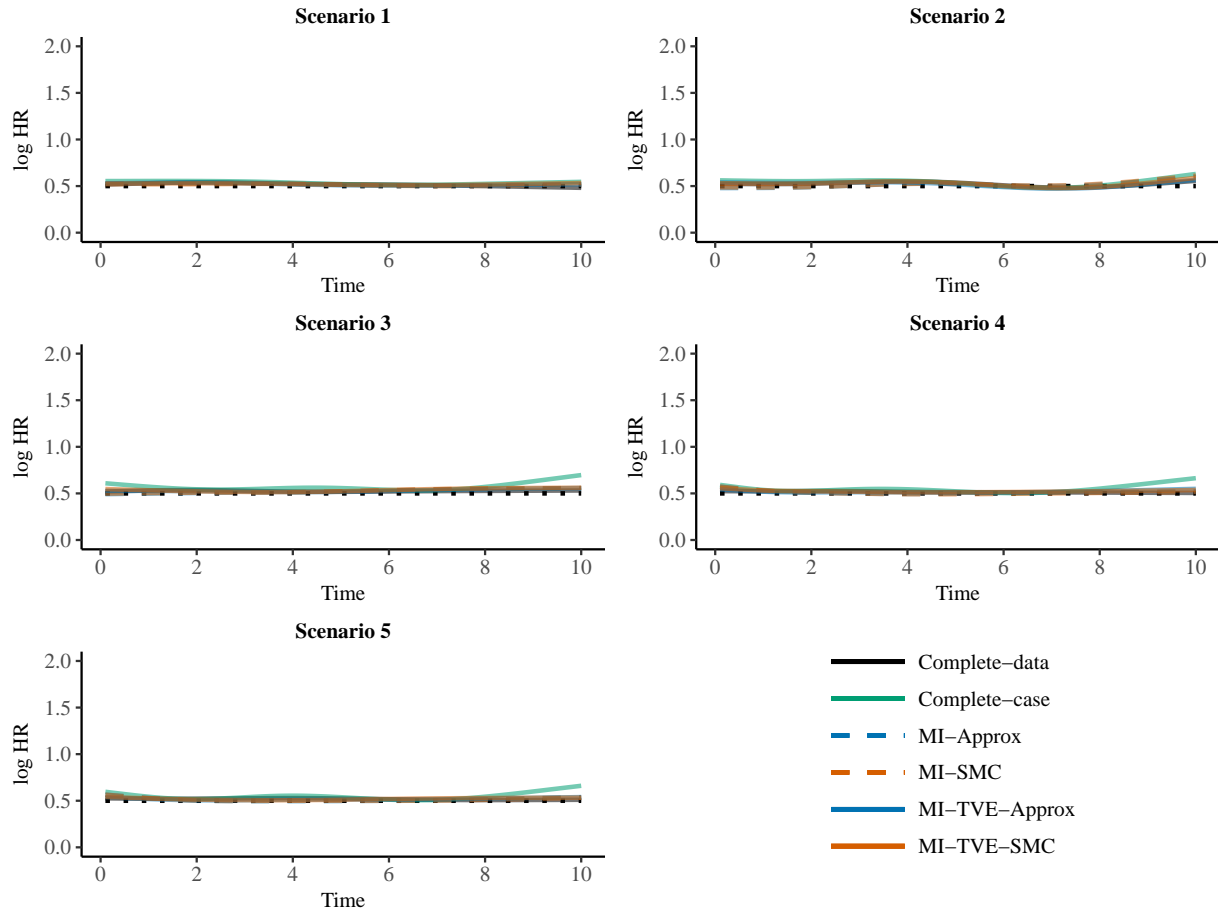



Figure S4. Curve-wise estimates of TVEs for covariate  $X_2$  in the setting with continuous covariates  $X_1$  and  $X_2$ . The dotted black line indicates the true curve. The curves are all approximately flat because  $X_2$  always has a non-TVE.

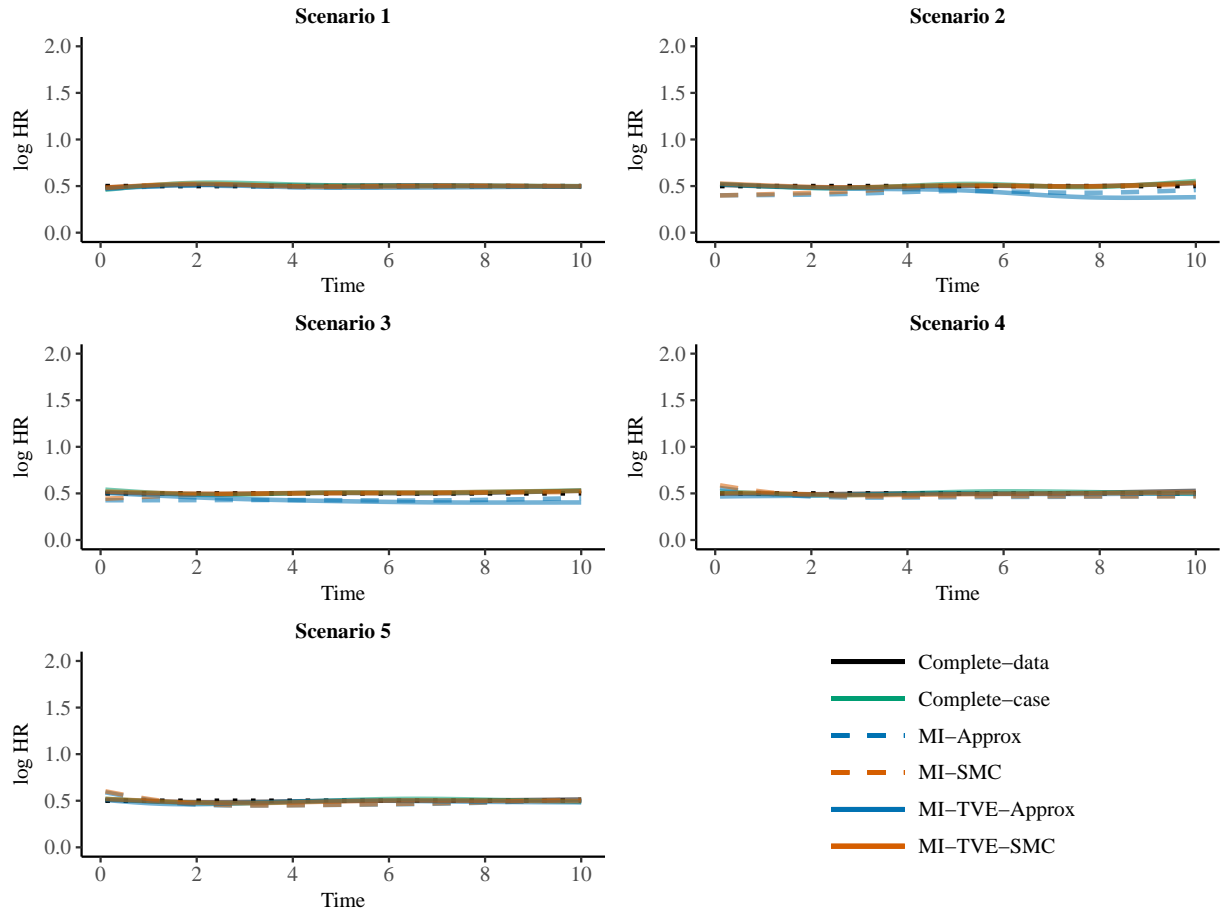

Figure S5. Curve-wise root mean squared error (RMSE) for covariate  $X_1$  in the setting with binary covariates  $X_1$  and  $X_2$ .

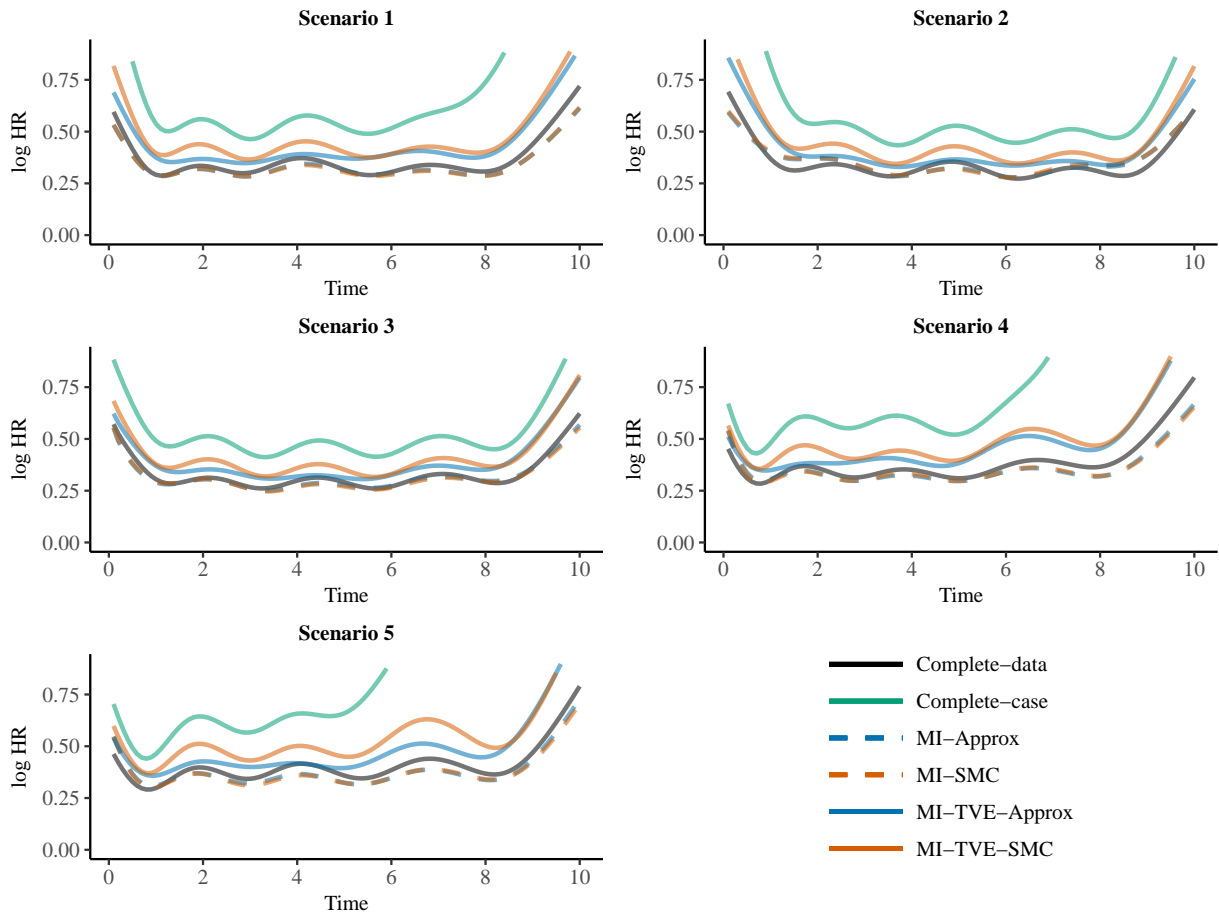

Figure S6. Curve-wise root mean squared error (RMSE) for covariate  $X_1$  in the setting with continuous covariates  $X_1$  and  $X_2$ .

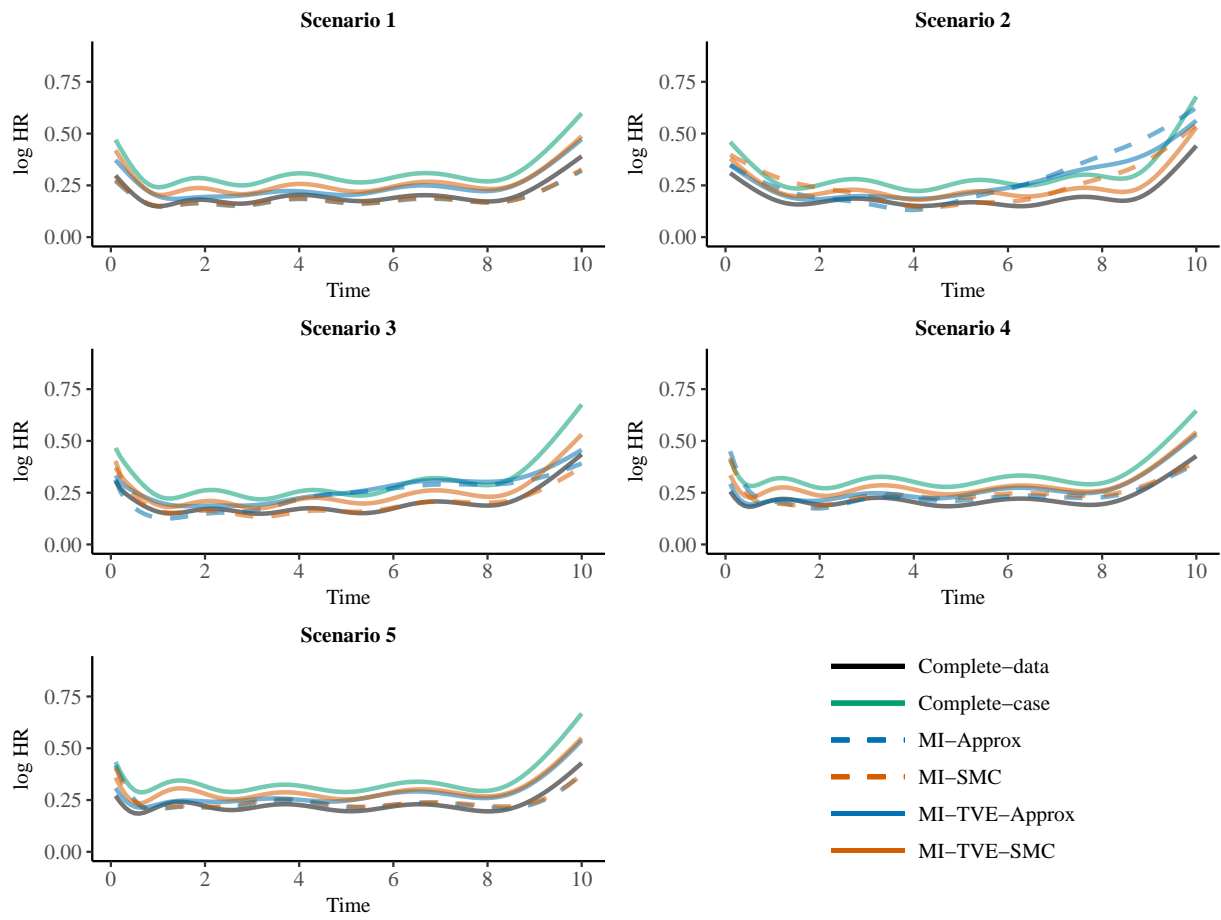

Figure S7. Example estimated TVE curves for covariate  $X_1$  from 100 simulated data sets. Results are shown for the setting with binary covariates  $X_1$  and  $X_2$ . The left-hand plots are from the complete data analysis and the right-hand plots are from the MI-TVE-SMC analyses.

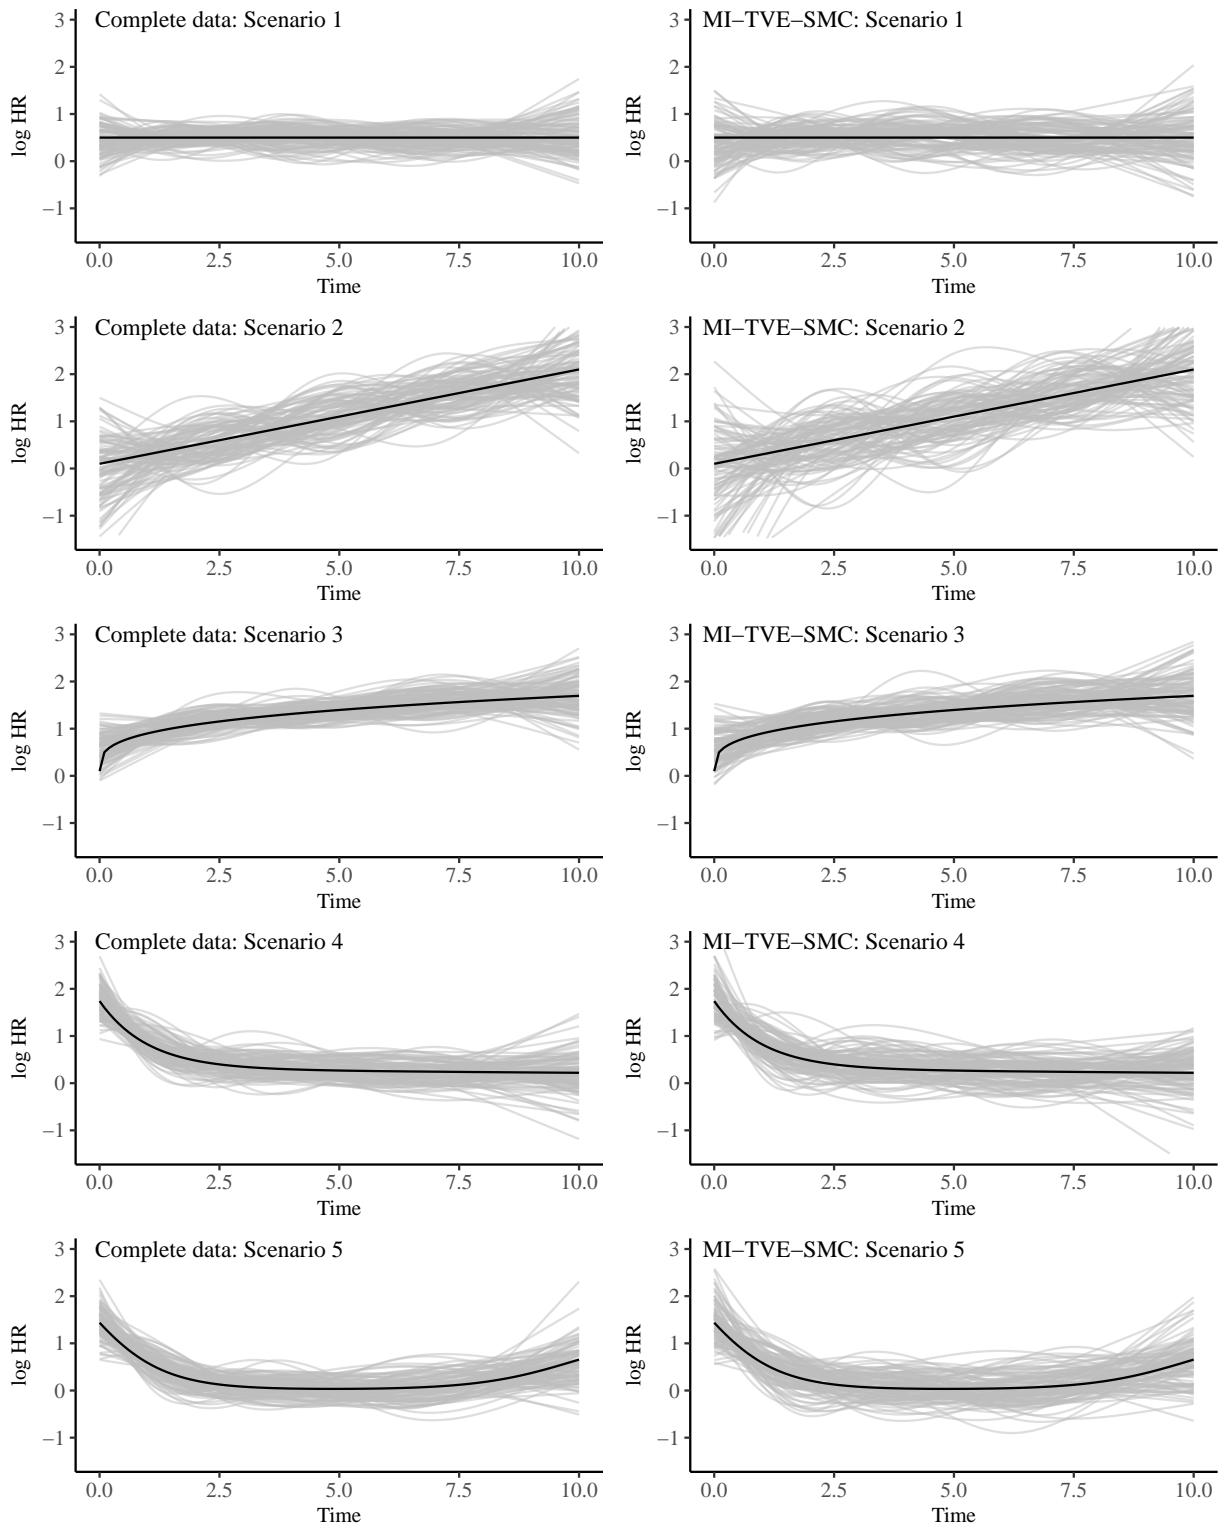

Figure S8. Example estimated TVE curves for covariate  $X_1$  from 100 simulated data sets. Results are shown for the setting with continuous covariates  $X_1$  and  $X_2$ . The left-hand plots are from the complete data analysis and the right-hand plots are from the MI-TVE-SMC analyses.

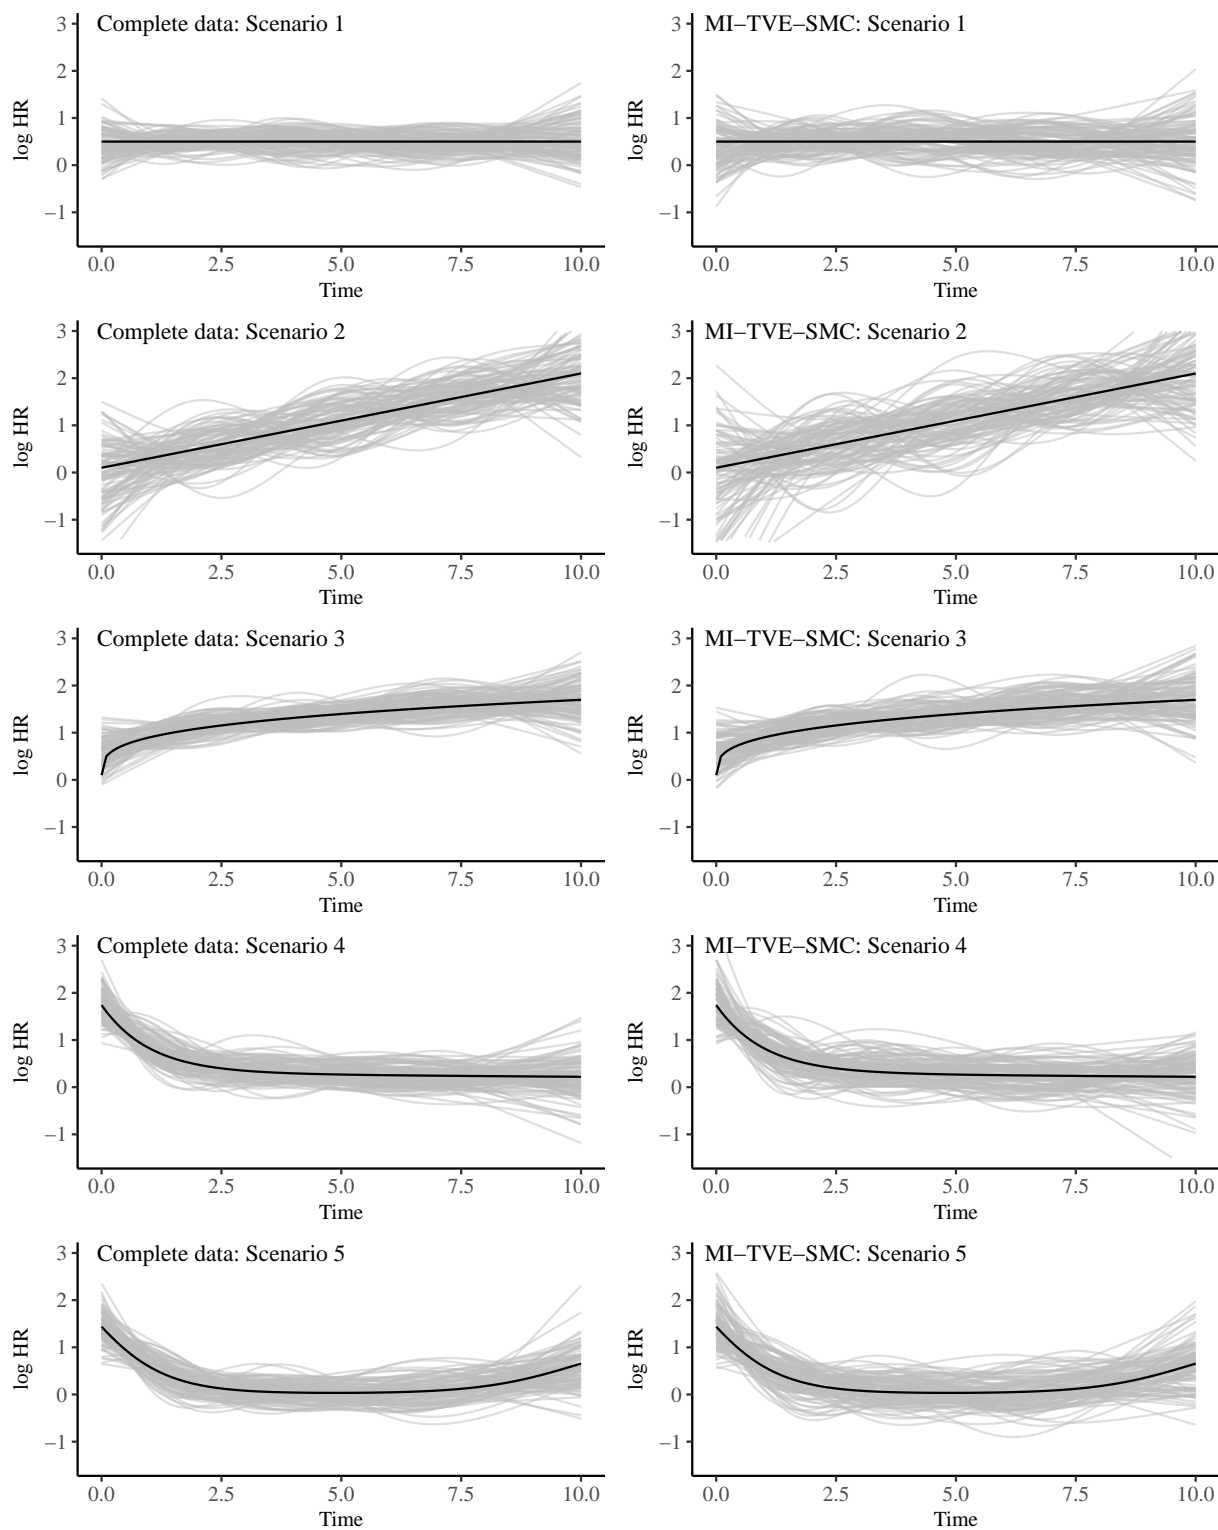

Figure S9. Results from the Rotterdam Breast Cancer Study. Plots showing estimated log hazard ratios as a function of time. The time-varying effects for all covariate were modelled using a restricted cubic spline with 5 knots. Results are shown up to time 10.

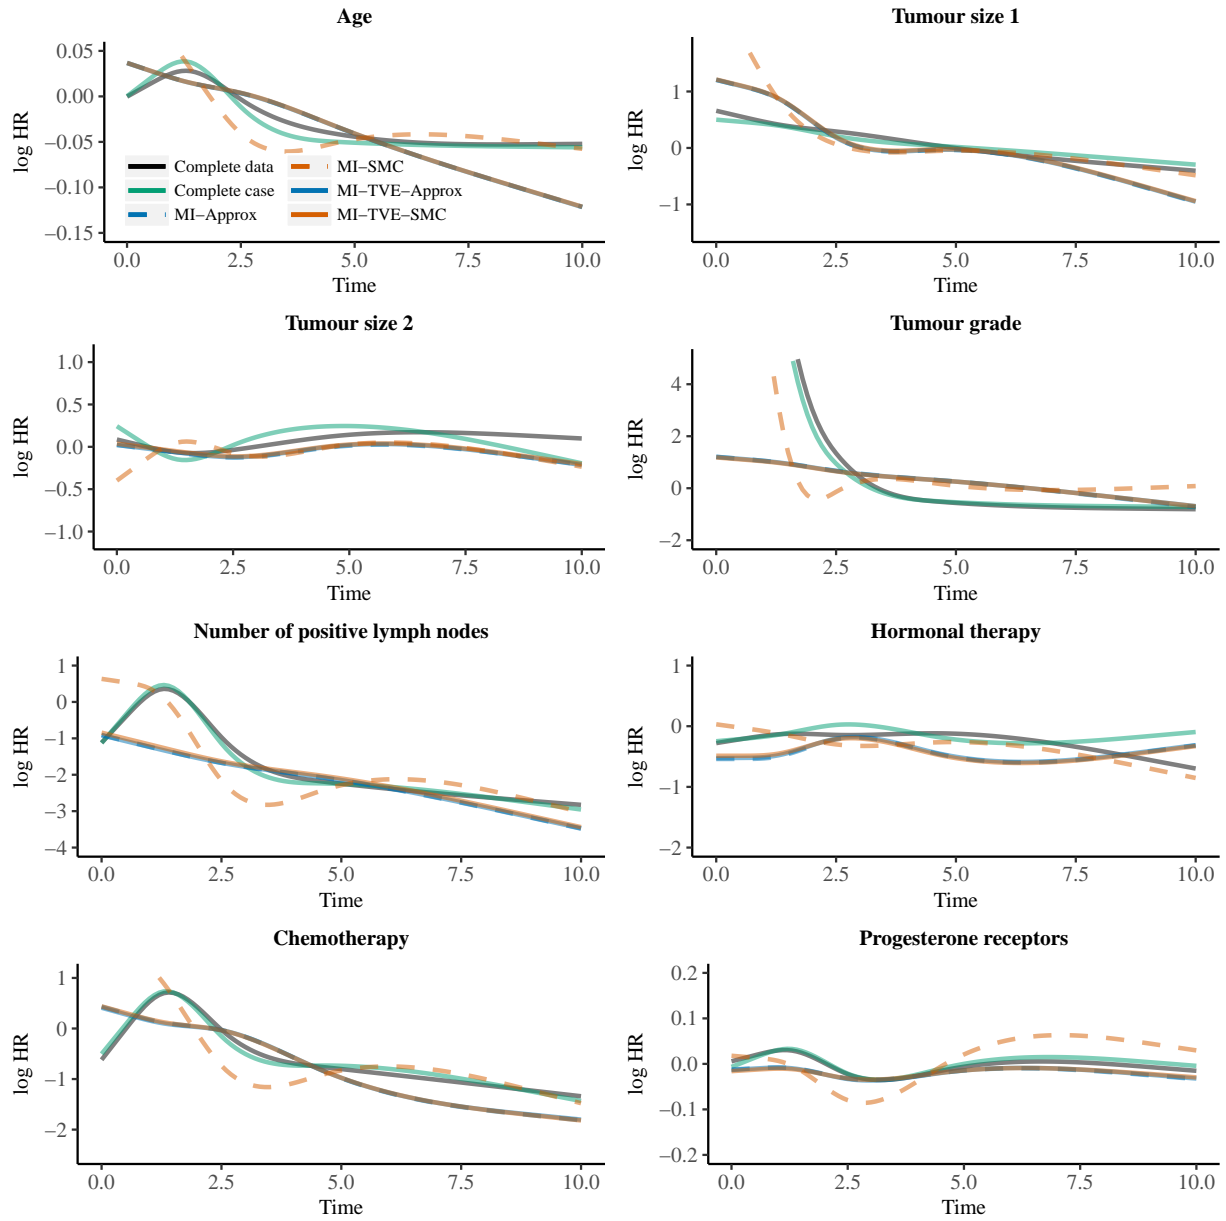

Supplement: SIM-37-3661-s001.pdf [file SIM-37-3661-s001.pdf]
